# Supplementary material for: Aberrant Methylation of the Imprinted C19MC and MIR371-3 Clusters in Patients with Non-Small Cell Lung Cancer
Source: MDPI journal article supplement (doi:10.3390/cancers15051466), 2023-02-25
Supplement: s1 [file s1]

**Supplementary table S1.** Characteristics of the study and control cohorts.

|                           | Patients (N=47)  | Controls (N=23) |
|---------------------------|------------------|-----------------|
| <b>Gender</b>             |                  |                 |
| Male                      | 76.6 (36)        | 87.0 (20)       |
| Female                    | 23.4 (11)        | 13.0 (3)        |
| <b>Age (years)</b>        | 67 [60-73]       | 35 [21-62]      |
| <b>Smoking status</b>     |                  |                 |
| Smokers                   | 40.4 (19)        | 30.4 (7)        |
| Ex-smokers                | 44.7 (21)        | 21.7 (5)        |
| Non-smoker                | 14.9 (7)         | 47.8 (11)       |
| <b>Packs-year</b>         | 41.0 [20.0-65.7] | 2.0 [2.0-20.0]  |
| <b>Histology</b>          |                  |                 |
| Lung adenocarcinoma       | 57.4 (27)        | -               |
| Squamous cell carcinoma   | 42.6 (20)        | -               |
| <b>Staging</b>            |                  |                 |
| Stage I                   | 40.5 (19)        | -               |
| Stage II                  | 38.3 (18)        | -               |
| Stage III-IV              | 21.2 (10)        | -               |
| <b>Subjects with COPD</b> | 42.6 (20)        | 17.4 (4)        |

Continuous variables are expressed as median [interquartile range (IQR)] and categorical variables as number of cases (%).
